# Supplementary material for: A Novel m7G-Related Gene Signature Predicts the Prognosis of Colon Cancer
Source: MDPI journal article supplement (doi:10.3390/cancers14225527), 2022-11-10
Supplement: s1 [file s1]

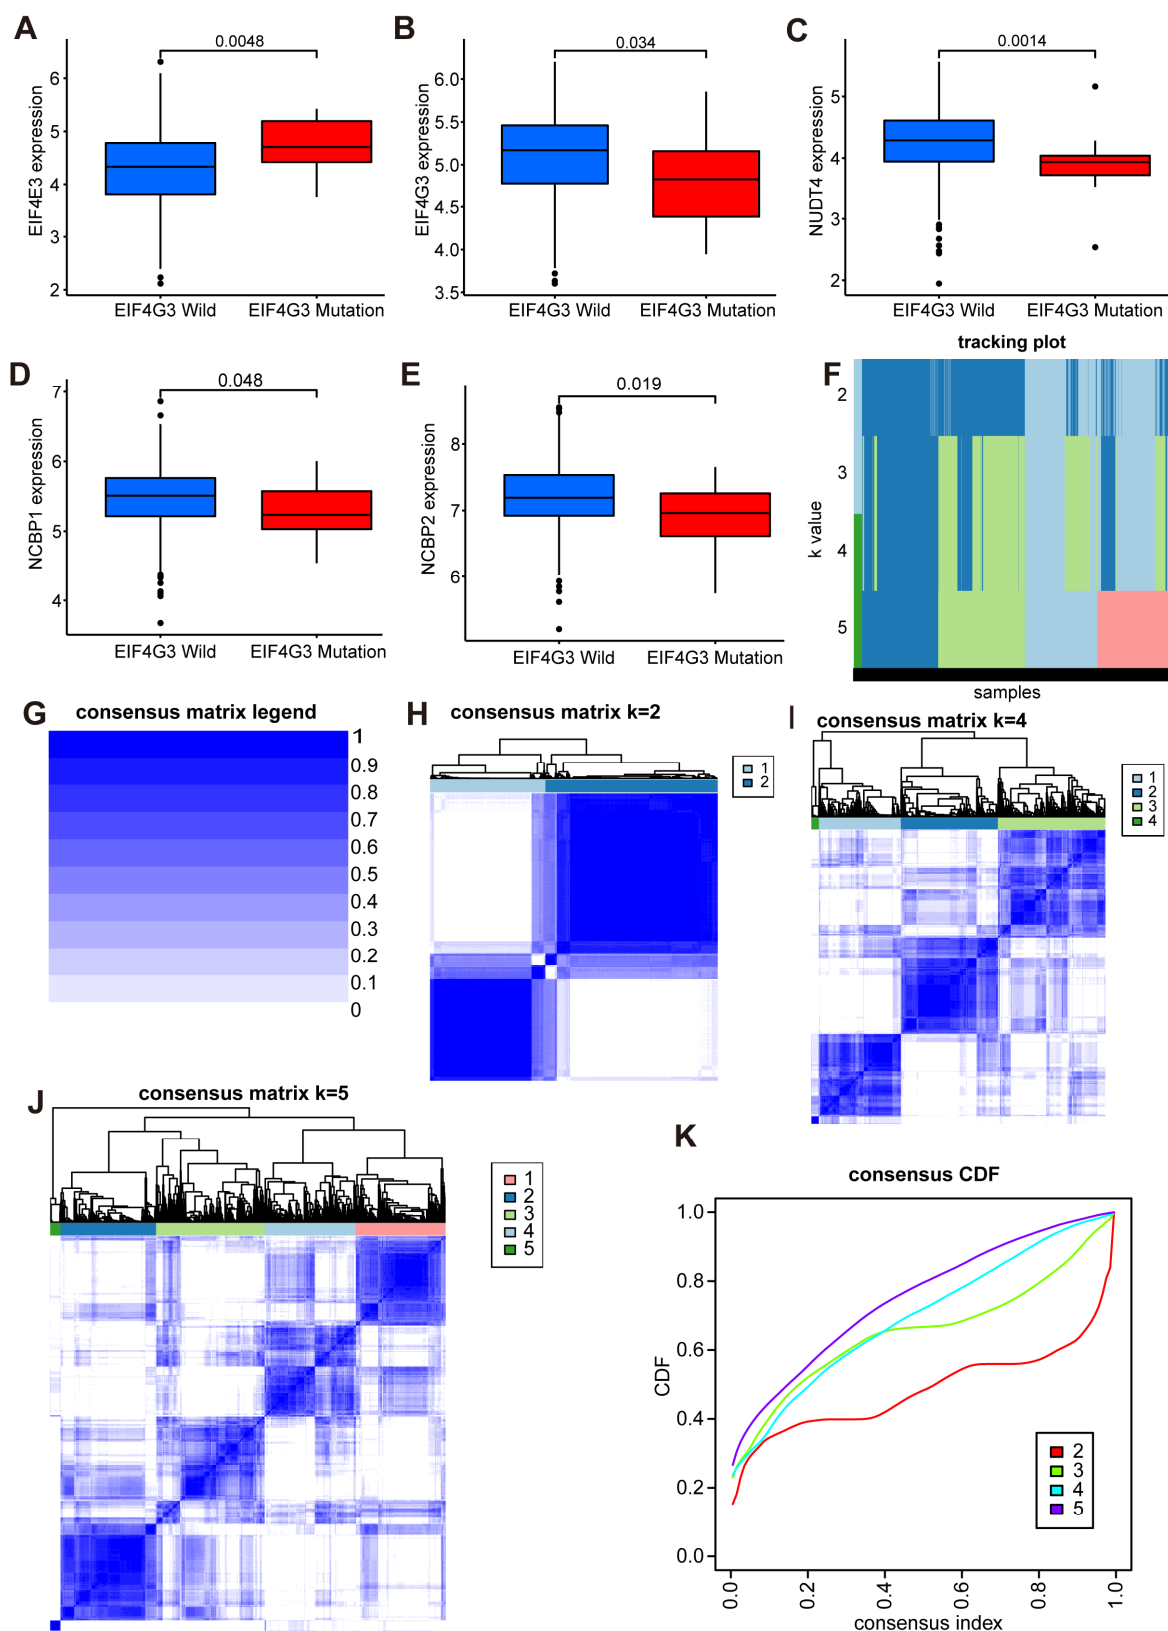

**Figure S1.** Correlation analysis and construction of m7G clusters

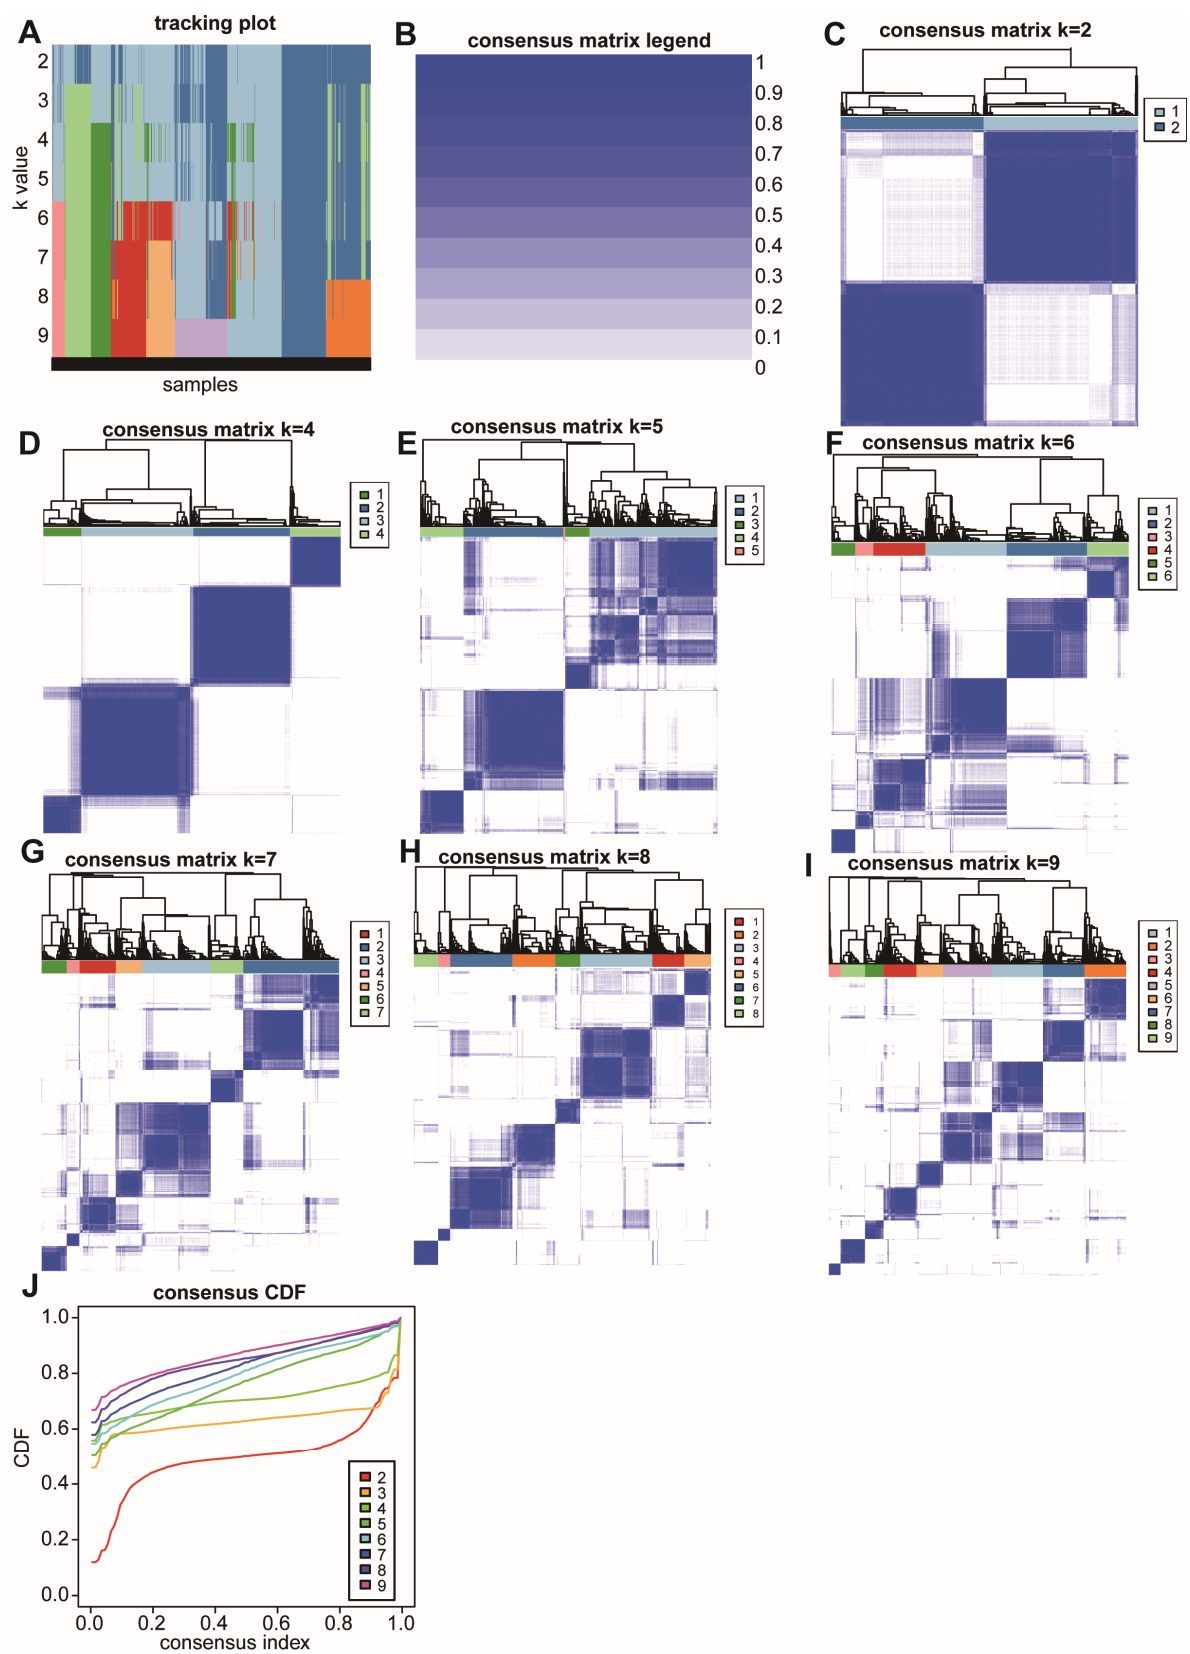

**Figure S2.** Gene clustering based on prognostic m7G-related DEGs in CC patients.

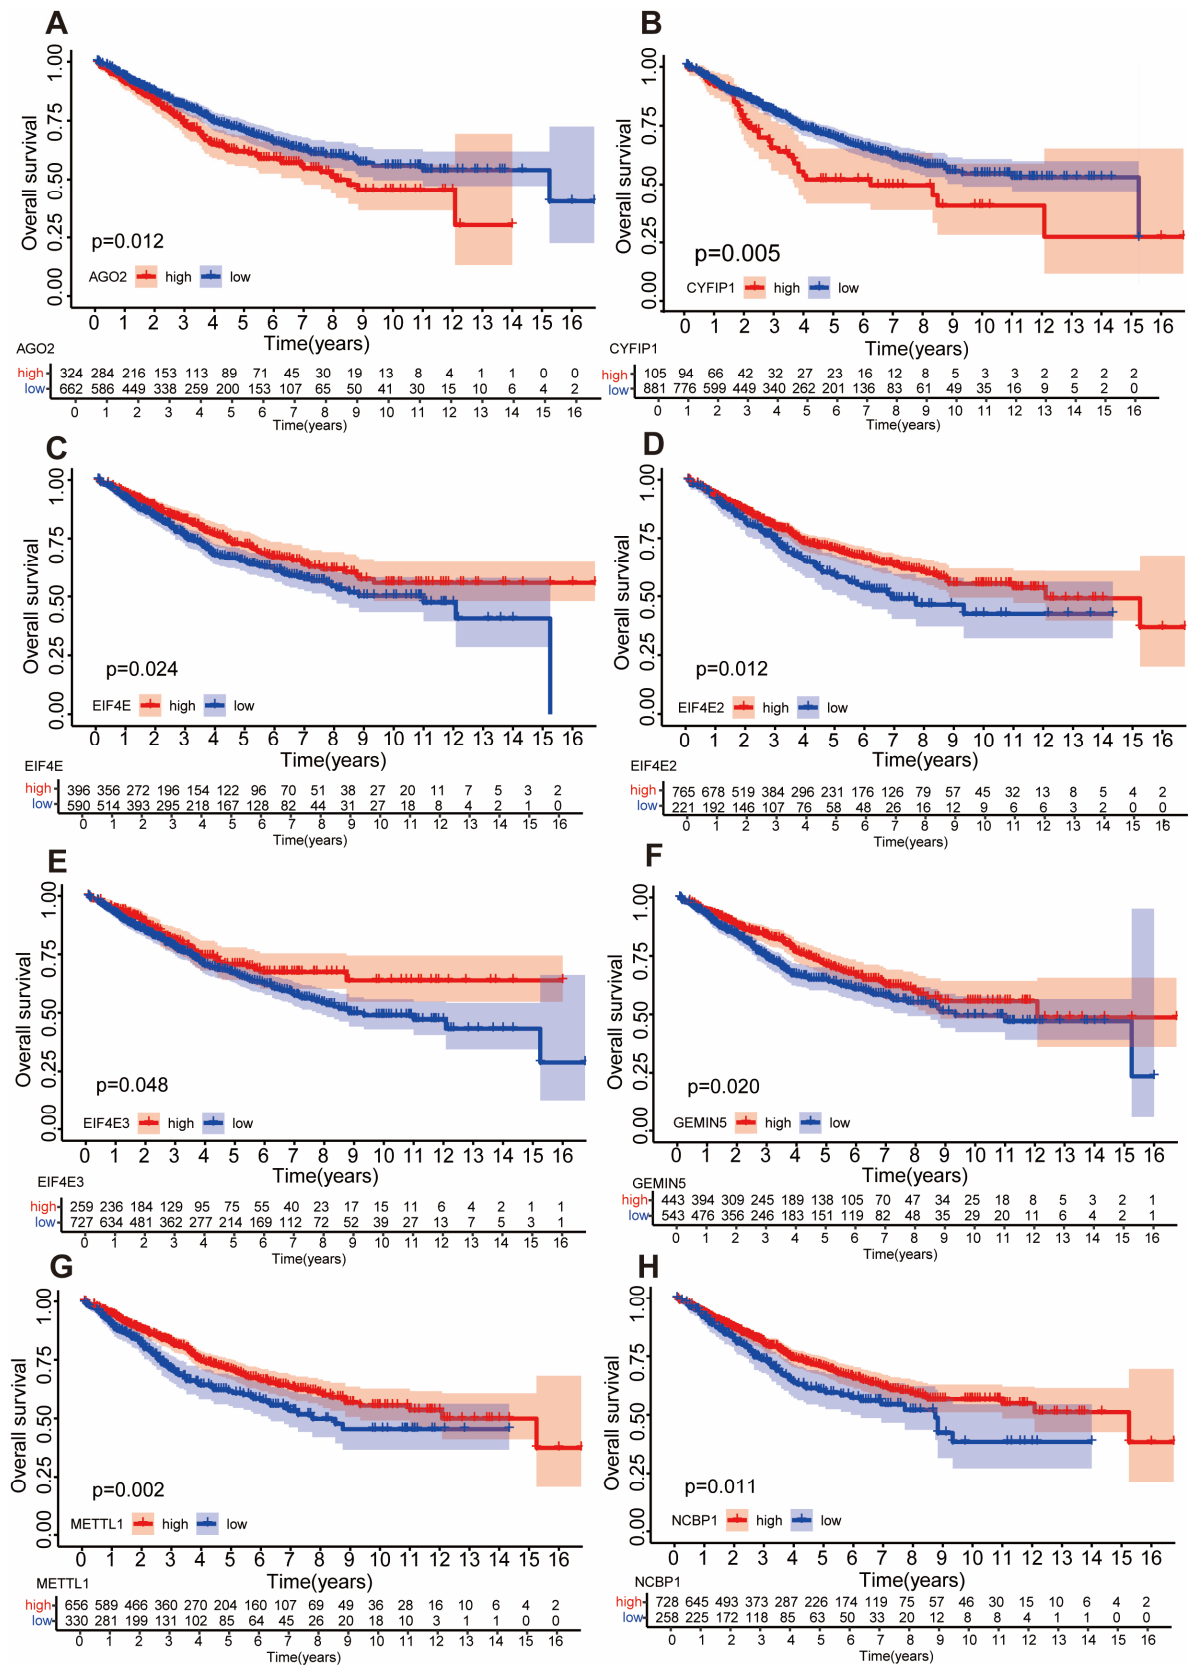

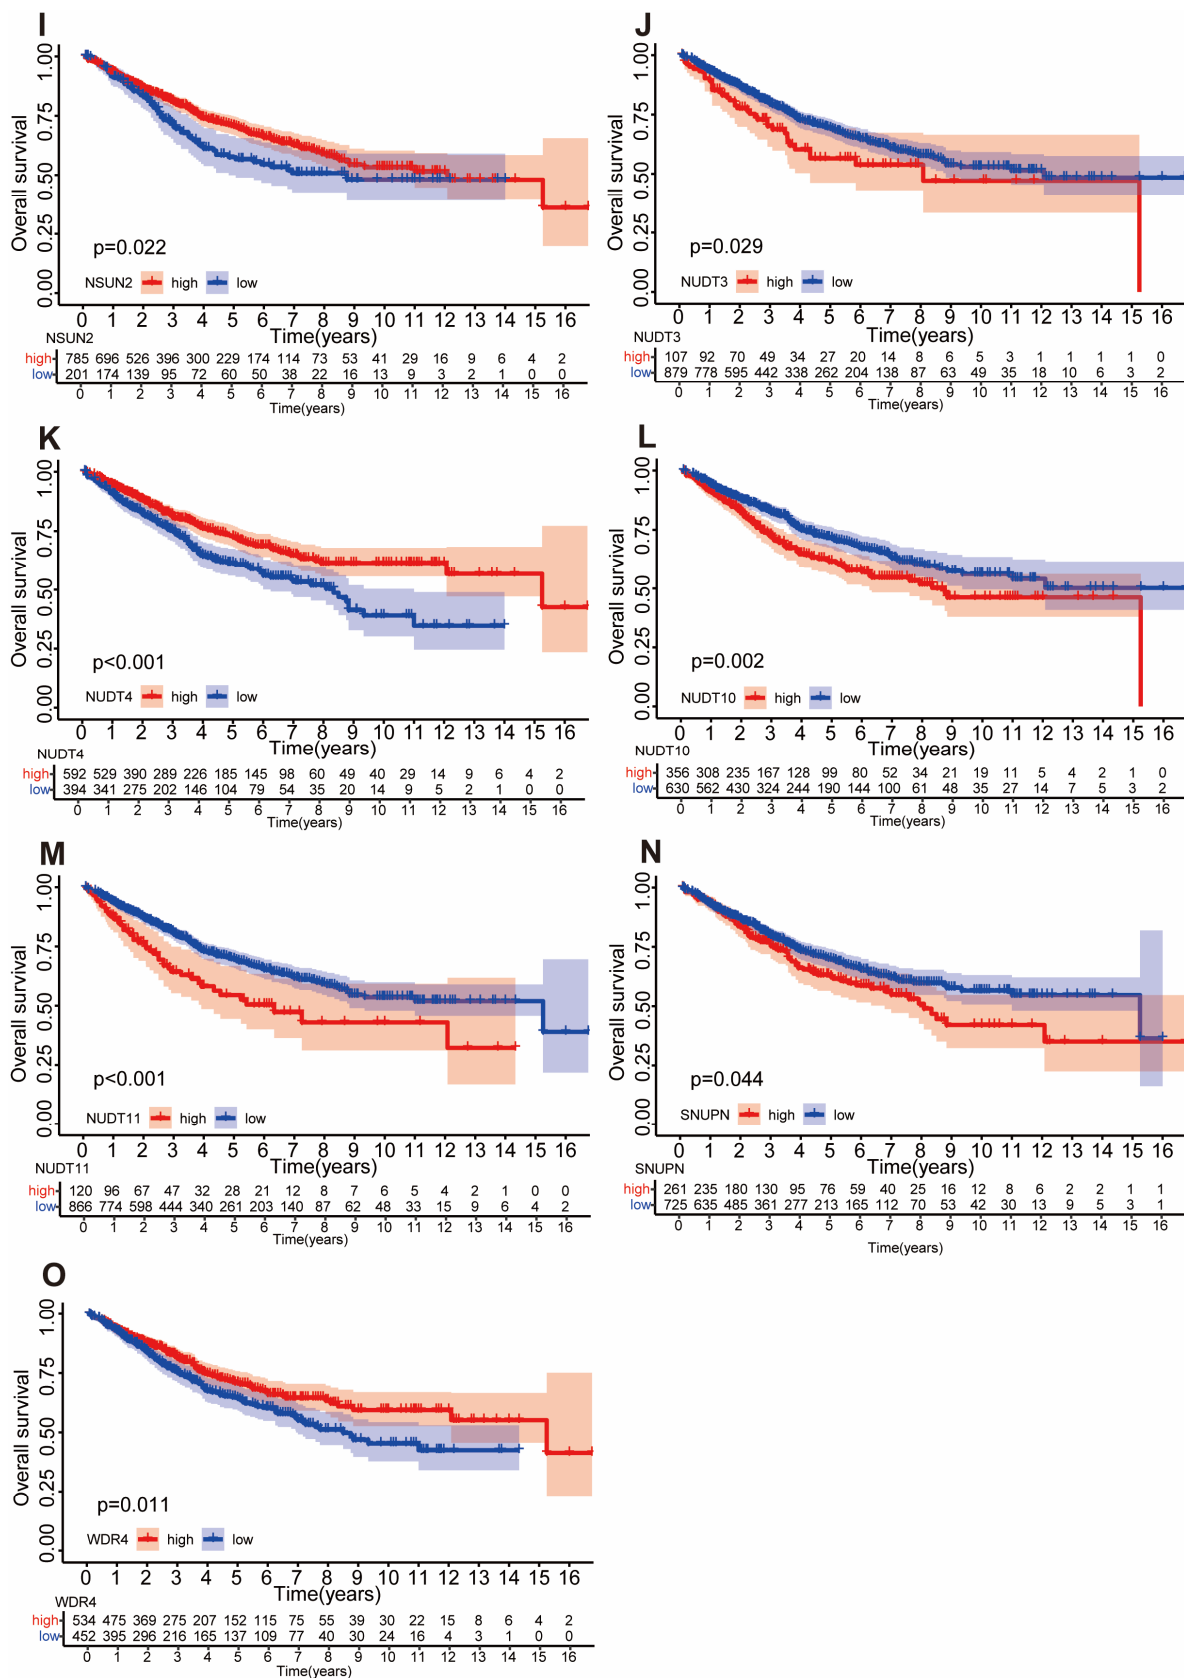

**Figure S3.** The KM Curves of OS of CC Patients with High and Low m7G Gene Expression
