# Supplementary material for: A Novel m7G-Related Gene Signature Predicts the Prognosis of Colon Cancer
Source: Cancers (Basel). 2022 Nov 10;14(22):5527. doi: 10.3390/cancers14225527 (PMC9688272; doi:10.3390/cancers14225527)
Supplement: Supplementary file 1 [file cancers-14-05527-s001.zip]

Archive with 6 entries (6 files):
- cancers-1992688-supplementary figures.pdf
- Table S1.xlsx
- Table S2.xlsx
- Table S3.xlsx
- Table S4.xlsx
- Table S5.xlsx
