# Supplementary material for: A Novel m7G-Related Gene Signature Predicts the Prognosis of Colon Cancer
Source: Cancers (Basel). 2022 Nov 10;14(22):5527. doi: 10.3390/cancers14225527 (PMC9688272; doi:10.3390/cancers14225527)
Supplement: Supplementary file 1 [file cancers-14-05527-s001.zip › Table S1.xlsx]

## Sheet: Sheet1
Table S1. List of 29 m7G-related genes.
Gene	Type
METTL1	m7G
WDR4	m7G
NSUN2	m7G
DCP2	m7G
DCPS	m7G
NUDT10	m7G
NUDT11	m7G
NUDT16	m7G
NUDT3	m7G
NUDT4	m7G
NUDT4B	m7G
AGO2	m7G
CYFIP1	m7G
EIF4E	m7G
EIF4E1B	m7G
EIF4E2	m7G
EIF4E3	m7G
GEMIN5	m7G
LARP1	m7G
NCBP1	m7G
NCBP2	m7G
NCBP3	m7G
EIF3D	m7G
EIF4A1	m7G
EIF4G3	m7G
IFIT5	m7G
LSM1	m7G
NCBP2L	m7G
SNUPN	m7G
