# Supplementary material for: A Novel m7G-Related Gene Signature Predicts the Prognosis of Colon Cancer
Source: Cancers (Basel). 2022 Nov 10;14(22):5527. doi: 10.3390/cancers14225527 (PMC9688272; doi:10.3390/cancers14225527)
Supplement: Supplementary file 1 [file cancers-14-05527-s001.zip › Table S2.xlsx]

## Sheet: Sheet1
Table S2. List of intersecting genes among different m7G clusters.
Intersection genes
EIF4E3
WDR4
PLCL2
CDK5RAP1
SLC5A6
NAT10
TPX2
SLC7A5
RRS1
UBE2C
TOMM34
TOP1MT
METTL1
DDX51
SLC3A2
DNAJA3
XPO5
DHX37
CDC25A
DHX34
AURKA
ATIC
RUVBL1
LYAR
TCOF1
MRGBP
ILF3
MTG2
ZPR1
TTI1
SSRP1
TOMM40
CMSS1
RRP1
CDCA5
FOXK2
USP36
LXN
KAT2A
RRP12
CSE1L
KIF18B
FAM114A1
CHCHD6
RBM19
GTF2IRD1
PDCD11
POLR1A
RAE1
NELFCD
ORC6
SKA3
TROAP
SP6
PIGU
EVI2B
HNF1A
ESPL1
TBC1D16
POP1
SPAG5
ZNF696
WDR5
PALD1
AATF
UTP14A
CEP250
CDCA3
ANAPC7
PRKDC
EXOSC2
PUS7
NUFIP1
PVR
DDX27
CCDC137
GEMIN5
SMARCD2
TSEN54
MCM3
POLDIP2
NABP2
PDRG1
CCNDBP1
MRTO4
ERAL1
PLAGL2
ASCL2
AGMAT
SNRPF
EIF3B
POU5F1B
DAPK1
POFUT1
GSN
SF3B3
TMEM97
NUP85
RAD54L
LIG3
DPYD
NFS1
NR2C2AP
EVI2A
TGIF2
CTPS1
SNRPC
WDR77
GPATCH4
NOP14
ACTR5
NAT9
LSM14B
LPAR1
DSCC1
NCAPD3
TIMELESS
DBF4B
SCARB1
RBM28
BHLHE41
COASY
RCL1
EFTUD2
MMP28
LAS1L
GNAQ
PTGER2
NOLC1
AUNIP
SRRT
MYO19
RPN2
GART
MYC
DOCK8
ZNF74
HAUS5
NEU3
CD59
SLC16A1-AS1
BCL7A
EARS2
SLC7A6
POLR1B
BRCA1
STIP1
SNHG17
TOX
FGL2
SRM
RELL1
C16orf54
RNF43
MRPS23
RFC3
MDC1
RANBP1
KIF4A
KPNA2
RRP1B
TRIP13
NCAPH
PA2G4
DFFA
PRKCB
BIRC5
MARS2
ZNRF3
TRANK1
ZNF202
KCND3
DNMT3B
RNPS1
SLC4A4
KIF2C
RAB27B
NCAPD2
QSOX2
LDLRAD3
CTNNBL1
SURF6
MCM4
URB1
SYT7
ZNF473
ACTR3B
TCF3
GPT2
DHODH
TP53RK
KLHDC4
RPS6KL1
CYTIP
NKRF
PSMG1
KNOP1
CD48
CTSE
ARID3A
EPHB2
URB2
ETV4
SLC7A1
HJURP
ARHGEF19
AGO2
MEX3A
C8orf33
TXNIP
POLE
CHD7
LY86
YTHDF1
CKAP5
MS4A6A
RFC4
SLC2A8
SMG5
PEX5
CYSLTR1
LINC00324
MLPH
RPIA
TMEM41A
POLR3A
MRPL48
RAD54B
SLC35C2
KHSRP
TMEM220
MCM10
TNPO2
C1orf112
CDC6
FAM53A
POLR1E
RARRES1
AAR2
MPEG1
PRPF6
ALOX5
CD52
GNPDA1
TM9SF4
CREB3L1
SART3
TAF4
CCT6A
DPAGT1
SOCS7
COPS7B
CELP
TCFL5
KCTD12
KCNMA1
GPR157
MTFR2
GBP2
RPP40
ZFYVE1
CYB5RL
MRPL36
RHOH
NUP93
MRPS17
MAPRE2
NCKAP1L
CD1D
PTRH2
ASXL1
FAM189A2
GRPEL1
BZW2
MS4A7
HSPE1
PROSER1
NR3C1
EXOSC8
AIFM1
PATZ1
SLC9A9
RNF144B
UBE2T
GGCT
MPPE1
IL10RA
TLR1
RFT1
ANG
RPL7L1
PPIH
GTSE1
CKS1B
CD53
CLIP4
MAFG
CEP72
GINS2
KIF20A
SMARCC1
SPON1
EGLN3
TTPAL
DHX35
LSG1
GNG4
SLC25A15
UQCC1
ALG8
PPFIA3
HLA-DRA
PTPRC
CCT5
C16orf91
SPATA2
ANGEL1
LARS2
ASAP3
TP53I3
CAPN10
METAP1D
EVPL
TTLL4
NCAPG2
MKI67
LY96
KLHL6
ZBTB7C
TCN2
HDGF
NOM1
SAFB
CCNB1
CYBRD1
RFWD3
ARHGEF6
SMCO4
LRP8
KRT23
TRIM22
RACGAP1
RAN
ZSWIM1
RASGRP1
AIF1
GINS1
CCT2
PALLD
CEP164
CDC25C
EBPL
GAR1
LINC01140
IPO5
MLLT6
NONO
IFFO2
BTK
GIMAP1
CA2
GID8
NUP205
HCLS1
ENPP2
ZDHHC9
RCSD1
SCGB2A1
CEL
CENPA
UMPS
GPR143
NCOA5
PLXDC2
MORC2
PAAF1
MRM1
SFXN4
HSP90AB1
C1orf109
DDX11
LARP1
LCP1
CKS2
ZWINT
TNNC2
CLEC10A
ISG20L2
SRPX
ATP8A1
TAGAP
PABPC1L
CXCR4
MTHFSD
B3GALT5
APBB1IP
HUNK
IKZF1
EPB41L3
CAMK2D
PPIC
PMP22
TMEM30A
GFI1
PSME3
ZBED3
PINK1
TCF7
MKS1
PDE4B
MEIS2
REG4
RALY-AS1
C1orf21
EIF2B3
EXOSC4
FFAR4
TBC1D24
NMT1
PRR7
CCR2
LMO4
ADH1B
TRAF3IP3
GZMK
ASNS
CLEC2B
FLI1
CSF2RB
TLR8
WDR59
TPBG
SEPHS1
ZC3H18
RNF8
PCID2
CCL19
ACACA
SRGN
EZH2
E2F5
MOCS3
GIMAP6
PFKM
LIX1L
CD180
GIMAP4
CITED2
FCHO2
RNF114
PDAP1
DDX19A
NUP98
KDM1A
ANO9
PTTG1
ROR1
RNF157
REEP3
PPIL1
MS4A4A
LINC01315
GPR65
GINS3
PRPF4
DIMT1
CIDEC
EXO1
HSD17B2
JAM2
WWOX
CPA3
NIT2
WBP1L
STC2
EIF2B5
IL16
ZNF77
AKAP8
CSTF1
MELK
ARHGAP25
SNTB1
CD96
CDK5R1
ZNF251
FAM222A-AS1
P2RY13
FITM2
IL1R2
XYLB
ZSWIM3
SYNC
ENGASE
SMIM4
MS4A8
SLAMF7
NR6A1
TMEM61
MT1M
CHP1
RAB11FIP4
STAM2
BORA
SPC25
TNFSF13B
DENR
BTN3A3
TUBGCP3
C10orf82
QPRT
VSIG2
PSAT1
DOCK2
PLCG1
NAPSB
FCGBP
MUC4
SAE1
CD1C
CHD4
POM121C
COLEC12
RASSF5
ATP2A3
HS3ST3B1
FCRLA
SLC2A13
ATP6V1B2
MED30
ODF2
TFAP4
CPSF3
SLC1A1
RASSF2
HPS4
CR1
POLR2D
UBAP2
MFAP5
RGS2
MUC2
PLCG2
ACLY
MLST8
TM6SF1
PPP1R16B
NDEL1
YBX1
WRNIP1
VNN2
PABPC1
PPP1R3D
C11orf95
SAC3D1
SMARCD1
EP400
SRD5A3
PLEKHA8P1
ODC1
MEI1
ANXA9
UGP2
EXOSC3
VNN1
FECH
DENND1B
S100B
PRPF40B
CD86
GIMAP8
IGF1
ST3GAL4
ZNF7
NUDT5
LAPTM4B
ATAT1
SELL
TRIB2
MAF
CXCL13
UBE2J1
RCC2
CYBB
CCDC69
LAMA1
CELSR3
FDCSP
DNAJC9
NKD1
TEX30
CYSTM1
BOD1
SNCA
LY9
IGLL5
LDHD
ELAVL1
GLIPR2
PTMA
CIAO1
ITLN1
PSPH
FZD1
CD2
SFMBT2
PAXIP1
HIC2
GPR137B
CPNE5
CDCA7
FAM107A
TANGO6
BEND5
ADRB2
F13A1
ARHGAP31
AGPAT4
GZMA
HOXB2
SECISBP2L
RAD54L2
HPSE
MIPEP
TRIM69
RPL26L1
PPP2R3A
RHPN1-AS1
SDR16C5
CKMT2
PXMP4
MYOM3
MRC1
MRPS5
SH3GLB1
PASK
POLR1D
CFH
TMEM106A
YRDC
CBX7
TRG-AS1
IGKC
ADRB1
STXBP5
IGHM
IRF4
CLMP
SFRP1
KDELR3
TRRAP
TCERG1
VIM
CENPN
HNRNPM
TMEM45A
TNFSF13
MITF
TGFBRAP1
CLEC7A
NRF1
ST6GALNAC6
ITM2C
MILR1
PRIM1
CCDC85B
RDM1
RAB18
FANCI
STEAP4
MCM6
MSRA
EIF1AD
CLEC4A
CENPW
P2RX4
E2F8
ABCG2
MGST3
OVOL1
RP9
ADORA3
PITX2
CDC123
CD79A
ZSWIM7
ARIH2
RAD51D
TG
MRPL15
CBFA2T3
BUB1B
RNF103
HSF2BP
CARD6
PLA2G4A
NES
CCL23
MIER1
FPR3
APMAP
MNDA
CCR5
PTDSS2
CD84
GNPTAB
MRPS15
CEP83
CAST
EMC3-AS1
CLDND1
MIEF1
RTP4
CHAMP1
HNRNPAB
HIGD1A
C1RL
ZNHIT2
ATF4
TMOD1
GNA13
ABHD5
ABCC1
CASD1
PPM1A
EXOSC1
RGS10
SHOC2
KCTD9
MRPS2
CCDC80
DPT
GNG12
SEL1L
KMO
SPACA3
PRKCH
PATL1
DTL
PIK3AP1
C20orf194
KLRD1
C1orf115
TRAK2
USP40
RNF44
VILL
ZNF239
PTPN1
C14orf132
NTAN1
ZNF629
GOLPH3L
FYN
CC2D1A
EDEM3
STX7
PLCD1
EFEMP1
TTC12
ZNF667-AS1
CILP
AFMID
CPEB2
C7
RRP8
MBNL1
ALDH1L1
FGD4
HNF4A
IGLV1-44
ATG4A
APEX2
ILF2
FABP4
PUS7L
CLCN2
ST3GAL6
ANKRD12
KIF21B
JMJD4
CAB39
RASSF6
NT5DC2
SERHL2
TAB2
CYP1B1
GALNT7
ELK1
GPR19
PWP2
OCEL1
ADIRF-AS1
OSER1
TSHZ3
CD177
CLUHP3
RPS6KB2
TMEM147
NEK7
BTN3A1
IPO4
MRPS25
TIGIT
C1S
SCP2
TMEM167B
B3GALT6
RPL32
RIPK2
NDUFA7
CPQ
PIPOX
ZSWIM6
TDRKH
SLC35A5
ZNF24
TRIM65
A2M-AS1
KIF9
CYC1
FAF1
TERF2
TMEM127
MAP7D2
PTTG1IP
TFF1
MCTP2
BCORL1
ABCA5
CPEB4
EPB41L1
TESPA1
PDLIM3
BIRC2
WFDC10A
FAM174B
CHCHD4
PRKAG2-AS1
MBOAT1
DIS3L2
UBE2N
ANKRD23
U2SURP
ITSN2
UBQLN4
GPR85
TLDC2
SUZ12
RNF19A
ORAI1
SLC44A1
EPS15
PRKACB
EME1
TPRKB
COQ10B
MRPL23
AHCTF1
CLPP
EIF2AK3
CD164
BRCC3
KLHL28
TC2N
PDCD1LG2
WDR26
HYAL1
RAP1B
DST
UBA52
TVP23B
ACTR10
CDC42SE2
FNIP2
ABI1
FANCG
MPP5
DPP8
SARS2
TANK
HEATR5A
SRSF10
AP5M1
GPAA1
FEM1C
RAB1A
LTC4S
MCL1
SLC35B3
PTAR1
IPO7
DNPH1
SOS2
B3GNT5
ACTR3
BBIP1
CDC14A
ARRDC3
TET2
MRPL38
SCARB2
ZNF443
RRN3
BTBD10
SEC62
UBE2D3
RABGGTB
LMBRD1
JKAMP
DMXL1
ZC3H15
SLC25A24
RNF126
PTPN11
SYTL2
KRCC1
RAB14
TAOK3
GOLGB1
ZNF628
MFSD12
RAB30
SLMAP
NUDT4
APPL2
ZNF654
GSTP1
ANKRD26
APC
NDUFAF3
KLHL20
WDR44
CHMP2B
PPP1CB
TRIQK
RPL39
RAB5A
CREBZF
HOOK1
C5orf15
SLC30A7
TMEM258
UBE2V2
SWT1
CENPK
RAB3IP
SEC23A
TMUB1
PPP1R16A
SRFBP1
GOSR1
POLR2I
GCC2
HRAS
EPB41L5
PGRMC2
LRP6
CTDNEP1
NBEAL1
ARL2BP
CAPN15
LSM8
RNF220
TMBIM4
IDH3G
AEBP2
TCEAL8
EIF1AX
MCM5
SLAIN2
LYSMD3
IL13RA1
TMOD3
DYRK2
GOLGA5
TMEM39B
PRKAR1A
CLINT1
CWC27
ITGB3BP
USP8
TBC1D23
SNX25
AMMECR1
MFSD6
LRRCC1
NOSTRIN
PAQR4
PNPLA8
INSIG2
LRP3
UBTD2
B3GAT3
DNAJB14
ZNF664
IL23R
FAM126B
SERINC5
C16orf72
BMPR2
SOCS5
TRAF3IP1
ZNF668
ZNF195
SRSF3
MRPL55
RPS5
CCAR1
TRAPPC2L
CGGBP1
B3GNT2
METTL25
PPP1R35
ST13
SENP7
TMEM33
HIPK3
GALK1
FAU
SPTSSA
CCDC126
RPUSD2
ARL8B
ZNF507
CDKN1B
KLHL8
GPS2
DCXR
MAP3K2
ITFG1
PRPF40A
GFM1
TMPO
NRIP1
AP2S1
RPE
SH3GL1
VPS13C
ACADM
SPOPL
C12orf29
TM9SF3
DNM1L
DDX46
LRIF1
GALNT3
FAM189B
STRBP
RHOT1
BRWD3
HSPB2
SCFD1
C3orf38
NSRP1
TSR3
PHF6
FAM91A1
TOR1AIP1
TRAPPC1
KRR1
RPAP3
TAF1D
TGFB1
GORAB
WDR36
NAA38
PSMD12
PUSL1
BLZF1
CHMP5
TAPT1
RYBP
RAB9A
IMPA1
ZBTB34
ECT2
ZFC3H1
KRTCAP3
MIB1
MAD2L2
PSMG3
ITGB1
CD58
RNF138
SENP1
UBL3
VPS51
HS2ST1
STX10
OTUD6B-AS1
PLEKHA3
VPS37A
YIF1A
HSDL2
SHISA5
AP3S1
MBTPS2
DYNC1LI2
TMEM160
ASB8
FMR1
PPM1B
PCGF5
FAM160B1
FTH1
TDP2
SOWAHC
SH3BGRL2
PSMC3
BCL10
SF3B5
CSNK1G3
TSPAN8
MORF4L2
PSMD2
ZNF414
ABCB6
SMC3
PLS1
RPGR
ARMCX5
ENPP4
MOB1A
ROCK1
NIPSNAP3A
ZBTB1
NRBF2
PPARGC1A
TTC33
PGRMC1
MGAT4A
NUFIP2
NELFB
SEC24A
KANSL1L
ZNF658
PHF20L1
LMF2
C3orf52
PARG
MYO9A
PANK3
LAMTOR3
CDK7
ORC2
DAAM1
RBM41
IFITM3
TCF12
ARID4A
RBBP6
RLIM
RHOT2
ATG2B
POC5
F2RL1
MAF1
ZNF776
GPD2
KIF3A
SLC39A3
ZBTB10
CAPZA1
CLMN
CEP70
MRPL42
CCNH
DCAF6
PDCD4
BRAP
RASEF
FAM199X
G3BP1
HDAC10
ACBD3
GET4
KIF2A
CDH1
STK38
PBLD
MRPL28
ANK3
RNF141
IER3IP1
ACAP2
SRBD1
CDK17
XRCC4
PFN1
SMAD1
TAB3
MIER3
TMCO1
ITCH
SRSF1
PPOX
FGD6
AIDA
CEBPZ
MORC3
SPATA6
MTM1
ICE1
CMPK1
PRELID1
TLK2
VAMP4
ARL14
YES1
LY6E
STAG2
RHOG
OSTM1
PEX1
ZNF182
CHD9
RAB5B
PRPF18
ALG10
TMTC2
KLF3
PRPF38A
SMC4
YIF1B
MAGI3
PRRC1
NEBL
RNF6
ARL1
ZNF81
WASL
MFAP3
ANKRD13A
CHML
TMA16
CSNK2B
ZC3H13
ESRP1
STX19
ETNK1
FKTN
TRUB1
AGAP2-AS1
PPP2R5E
PBDC1
FAM13A-AS1
MAP3K13
NEDD1
APOOL
GSPT1
ATXN3
ZBTB33
C2orf49
ANKRD50
PLRG1
CEP290
MBNL3
TIMM23B
HNRNPR
MBTD1
ARF6
ERAP1
JRKL
KEAP1
UBE3A
PCM1
OCRL
OPHN1
TRMT13
GPRIN3
ANAPC15
SOS1
ZNF605
PIGN
CIPC
UACA
LARP4
LMAN1
AIMP1
MAZ
BMP2K
PLSCR1
SETX
HIC1
XRN1
LUC7L3
EEA1
HNRNPA3
SUCLG2
PITX1
PTBP3
PPHLN1
INTS6
AHI1
AZI2
BMP5
TRIP11
MTG1
CD81
C4orf33
ABHD17B
PURA
FNIP1
PLEKHF1
NR2C1
PPP4C
SKP1
TMX1
AKAP9
ZNF771
AK6
BTBD7
MMD
WDFY3
LRRC19
RMDN2
SLC38A1
C8orf82
GSK3B
TMF1
SAMD12
SATB2-AS1
SNX4
RBM47
CLDN12
SLC35A3
HNRNPK
TMEM87B
ATP2B1
KRAS
RNF208
MAPK8
DPP7
NAA50
MTF2
STAG1
MPZL3
CCDC186
CMTM6
ZBTB45
FIBP
TRNT1
SATB2
COPB1
SESTD1
HTRA2
USP1
AIP
AKR7A2
ATP13A3
CNOT8
ERP44
ZNF326
MRPL19
LRRC58
MMAA
CDC73
GEN1
SPAG1
SCYL2
ZNF84
SYDE2
PDE8A
PGM2L1
PDE3B
BDH2
APBA3
METAP2
USP33
REEP6
TBC1D19
ARL6IP6
ATF2
NLK
SETD2
CRBN
METTL4
PRMT5
MBLAC2
KATNBL1
RAB6A
ARFGEF1
CELF2
DNTTIP2
SNX14
ZNF146
TYW5
BDP1
CETN3
TMEM131
ARHGAP26
ZNF566
LTN1
CASP3
SLC25A36
ABCD3
RAB3GAP1
RSBN1
TAF13
TMEM167A
PAIP1
ELF2
ZNF567
TMEM126B
ZMYM2
FBXO34
CHIC1
ARFIP1
RNF146
PRC1
TCIRG1
SULT1B1
ZFAND6
ACAP3
SCO2
CTDSPL2
MRPL1
STEAP2
RFX1
THAP11
HCFC1R1
DESI2
LSM14A
NUP54
DHX15
EXOC5
LRRC8D
BROX
ABRACL
BCKDHA
ZNF273
NEK4
TOMM5
PRPF38B
CAPRIN1
PDCD6IP
VWA1
RNF14
PNPLA2
ZCCHC9
ATOX1
PHKB
TBC1D8B
RPP25L
FZD6
PGGT1B
FRK
ABCA11P
RCHY1
LSM10
IFRD1
CCDC14
ARSK
ZNF92
NECAP1
SYAP1
CYB5R4
ARHGAP12
CDC42
PPP1R12A
CENPC
DHRS13
HSD17B4
VPS13D
CNEP1R1
TMEM38B
NUTM2A-AS1
TMBIM6
SCAMP1
EXOC6B
TTC39B
PARM1
GEMIN7
CHURC1
MOSPD1
GCLC
APPBP2
CNST
FBXO3
RND3
ARHGAP21
PRMT9
PLCE1
SUDS3
RALGPS2
AFF1
CSNK1A1
TPD52
MON2
HDDC3
INIP
AMD1
ZBTB26
ACVR1C
DNAJC12
BBX
TXN
WDR24
TERF1
AGL
BPTF
ASXL2
SLK
F12
MGRN1
LRRFIP1
OSBPL9
ATXN7L3B
ARHGAP5
SDHAF1
NRM
FPGS
FGD5-AS1
ZNF226
FSD1L
MIF
SEC22A
ZXDB
DPH3
PTPN4
DCUN1D1
PICALM
ZNF800
ROCK2
RBM6
PDLIM4
IPO8
UBXN11
HYAL2
FAM89B
IER5L
ANAPC10
SENP3
RNF13
