# Supplementary material for: A Novel m7G-Related Gene Signature Predicts the Prognosis of Colon Cancer
Source: Cancers (Basel). 2022 Nov 10;14(22):5527. doi: 10.3390/cancers14225527 (PMC9688272; doi:10.3390/cancers14225527)
Supplement: Supplementary file 1 [file cancers-14-05527-s001.zip › Table S3.xlsx]

## Sheet: Sheet1
Table S3. List of 211 prognostic DEGs among different m7G clusters.
Prognostic genes
CDK5RAP1
AURKA
TOMM40
PIGU
POP1
PLAGL2
AGMAT
POU5F1B
DAPK1
TMEM97
NUP85
NFS1
WDR77
NOP14
TIMELESS
RPN2
MYC
CD59
MRPS23
RANBP1
PA2G4
BIRC5
MARS2
SLC4A4
PSMG1
EPHB2
TXNIP
LINC00324
TNPO2
GPR157
GRPEL1
BZW2
RFT1
ANG
GTSE1
CLIP4
GINS2
SPON1
SPATA2
LARS2
CCNB1
CYBRD1
RACGAP1
CEP164
CDC25C
GAR1
LINC01140
CA2
ENPP2
ZWINT
SRPX
PABPC1L
PPIC
PMP22
PSME3
ZBED3
MEIS2
FFAR4
ASNS
TPBG
LIX1L
RNF114
PTTG1
RNF157
MS4A4A
GINS3
DIMT1
STC2
FITM2
TMEM61
RAB11FIP4
FCGBP
CD1C
COLEC12
CR1
RGS2
MUC2
NDEL1
WRNIP1
PLEKHA8P1
PRPF40B
IGF1
TRIB2
CXCL13
ITLN1
FZD1
GPR137B
F13A1
HOXB2
SECISBP2L
MIPEP
CKMT2
TMEM106A
VIM
TMEM45A
MITF
PRIM1
RAB18
STEAP4
MCM6
MSRA
ADORA3
CBFA2T3
NES
HNRNPAB
ATF4
CCDC80
SPACA3
C20orf194
C14orf132
ZNF667-AS1
CILP
C7
HNF4A
FABP4
ST3GAL6
CYP1B1
ADIRF-AS1
TSHZ3
CD177
MRPS25
CPQ
KIF9
CYC1
PTTG1IP
PDLIM3
CHCHD4
UBE2N
AHCTF1
CLPP
WDR26
CDC42SE2
SARS2
BTBD10
NUDT4
KLHL20
HOOK1
POLR2I
MCM5
PRKAR1A
INSIG2
B3GAT3
IL23R
SERINC5
BMPR2
SOCS5
SENP7
GALK1
PSMD12
ZBTB34
ITGB1
STX10
TMEM160
ASB8
SF3B5
TSPAN8
MORF4L2
PLS1
ROCK1
PPARGC1A
KANSL1L
MYO9A
RBBP6
F2RL1
CLMN
KIF2A
PBLD
AIDA
PRELID1
MAGI3
ZC3H13
GSPT1
ERAP1
JRKL
GPRIN3
ANAPC15
PIGN
UACA
BMP2K
SETX
SUCLG2
PLEKHF1
LRRC19
RBM47
CLDN12
RNF208
DPP7
SATB2
AIP
MMAA
SPAG1
ARHGAP26
CASP3
SLC25A36
ABCD3
RAB3GAP1
ARFIP1
RNF146
ZFAND6
HCFC1R1
DHX15
HSD17B4
PARM1
TPD52
ACVR1C
BBX
LRRFIP1
PICALM
ZNF800
PDLIM4
IER5L
