# Supplementary material for: A Novel m7G-Related Gene Signature Predicts the Prognosis of Colon Cancer
Source: Cancers (Basel). 2022 Nov 10;14(22):5527. doi: 10.3390/cancers14225527 (PMC9688272; doi:10.3390/cancers14225527)
Supplement: Supplementary file 1 [file cancers-14-05527-s001.zip › Table S4.xlsx]

## Sheet: Sheet1
Table S4. List of 15 prognosis-associated m7G genes.
Prognostic m7G gene
AGO2
CYFIP1
EIF4E
EIF4E2
EIF4E3
GEMIN5
METTL1
NCBP1
NSUN2
NUDT10
NUDT11
NUDT3
NUDT4
SNUPN
WDR4
