# Supplementary material for: A Novel m7G-Related Gene Signature Predicts the Prognosis of Colon Cancer
Source: Cancers (Basel). 2022 Nov 10;14(22):5527. doi: 10.3390/cancers14225527 (PMC9688272; doi:10.3390/cancers14225527)
Supplement: Supplementary file 1 [file cancers-14-05527-s001.zip › Table S5.xlsx]

## Sheet: Sheet1
Table S5. Primers of m7G-related genes utilized for qPCR in this study.
Gene	Forward primer	Reverse primer
AGO2	TGAGCTTGCAGGCGTTACAC	CAAGAGGGTTAGAGCAGCCTT
CYFIP1	GTTCCTGTACGACGAAATTGAGG	GTGGCTCCCTGATTCTTGC
EIF4E	GAAACCACCCCTACTCCTAATCC	AGAGTGCCCATCTGTTCTGTA
EIF4E3	GAGTTAGTGTCAGTGTTCGGG	TGTGGGGCAGAAGTTCATAGA
METTL1	TGGCCTGTTAGCTGACAAAGATG	GGTGCTCTTCGAAATGAGTGC
NSUN2	GAACTTGCCTGGCACACAAAT	TGCTAACAGCTTCTTGACGACTA
NUDT10	TGGTTGATAGTGGGGGAGGAT	CCCACAGGCAGTTGTTTCAC
NUDT11	AGAAACTAAAGCTGGGCGGT	TTGGGAACACAGAAGTGCTCA
NUDT3	GAGGAGGTGCTACTCGTGAG	CAATGTCCCTTTTACTCCAGCC
SNUPN	CAAGCGGCTGGATTATGTGAA	AGGAACGTCAATTAACCACTCAG
NUDT4	CCTAGCGGGAGTCACCATCT	TCCTCCTGGGACAATCCACT
GEMIN5	CGGCTTGTAGTTATGGGGCA	CCTATGACTCGAAACGGGGG
EIF4E2	ACAACAAGTTCGACGCTTTGA	TCTCTTGCTACTGCTCTGATTCT
NCBP1	GTTGCACGCCTATTACCTGAG	GGACCAAATACACGGCTTCATTA
WDR4	CCACCTCCATAGCAAGCAGTG	ACGCTTACTGTCATCGGTTAAAG
